# Supplementary material for: Spin transition nanoparticles made electrochemically
Source: Royal Society of Chemistry journal article supplement (doi:10.1039/c9nr09884d), 2020-01-01
Supplement: c9nr09884d1.pdf [file c9nr09884d1.pdf]

1                                    **ELECTRONIC SUPPLEMENTARY INFORMATION**

2

3

4   **Spin transition nanoparticles made electrochemically**

5 Guillermo Pozo,<sup>a</sup> Patricia de la Presa,<sup>b,c</sup> Rafael Prato,<sup>a,d</sup> Irene Morales,<sup>b,c</sup> Pilar Marin,<sup>b,c</sup> Jan  
6 Fransaer,<sup>d</sup> and Xochitl Dominguez-Benetton<sup>a,e,\*</sup>

---

7 <sup>a.</sup> *Separation and Conversion Technologies, VITO, Flemish Institute for Technological Research,*  
8 *Boeretang 200, 2400, Mol, Belgium.*

9 <sup>b.</sup> *Instituto de Magnetismo Aplicado, UCM-ADIF-CSIC, Universidad Complutense de Madrid A6*  
10 *22,500 Km, 28230 Las Rozas, Spain..*

11 <sup>c.</sup> *Dto. Física Materiales, UCM, Universidad Complutense de Madrid, 28040 Madrid, Spain.*

12 <sup>d.</sup> *Department of Materials Engineering, Surface and Interface Engineered Materials, Katholieke*  
13 *Universiteit Leuven, Kasteelpark Arenberg 44 - box 2450, 3001 Leuven, Belgium.*

14 <sup>e.</sup> *SIM vzw, Technologiepark 935, BE-9052 Zwijnaarde, Belgium*

15 \* *Corresponding author: xoch@vito.be*

16

17

18

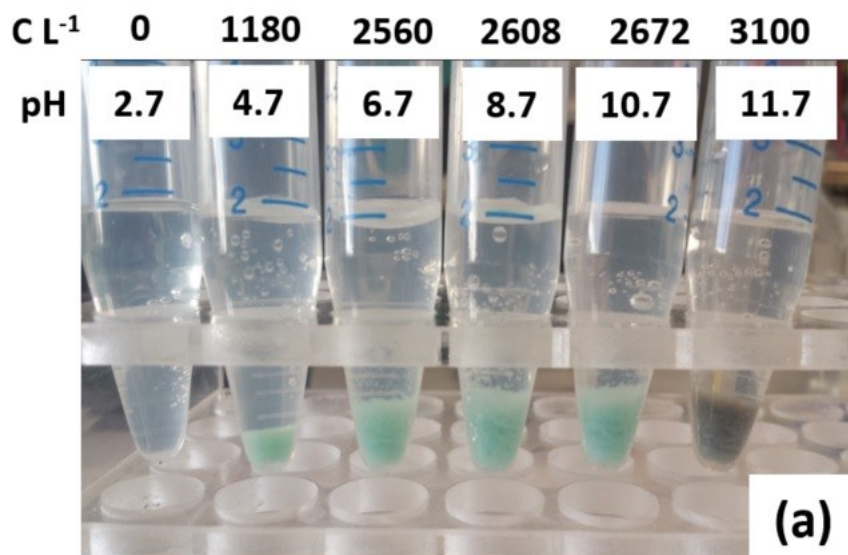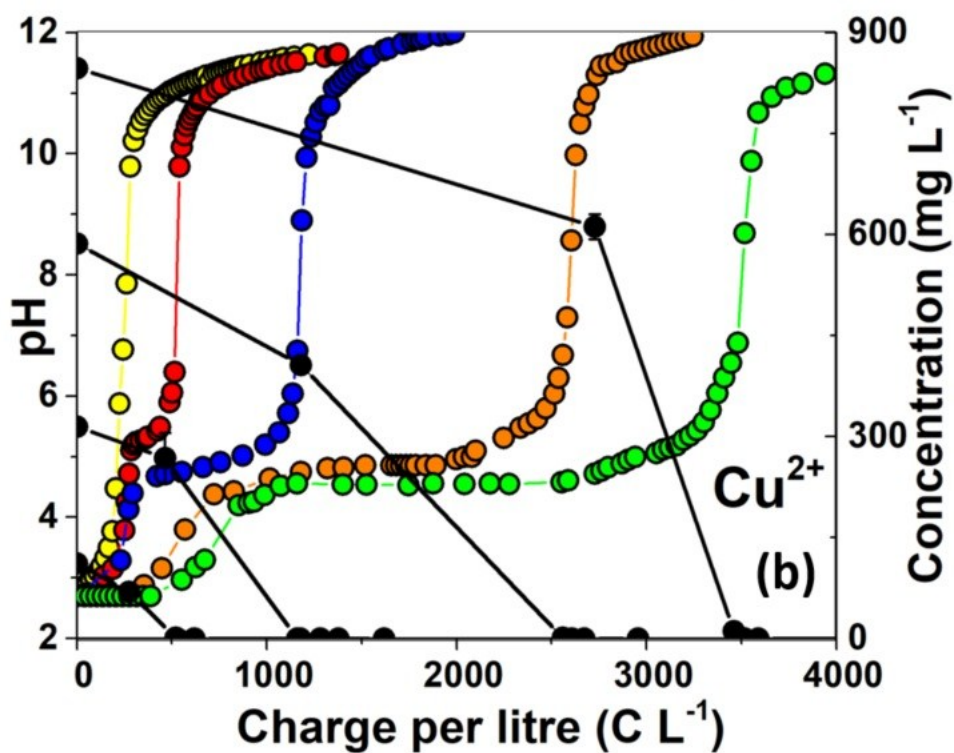

19

20 **Figure ESI1.** (a) Photograph of liquid samples taken at different pH using 9 mM of  $Cu^{2+}$  as  
 21 metal precursor (orange line) according to increasing charge density (0 to 3100  $C L^{-1}$ ). (b) Effect  
 22 of single  $Cu^{2+}$  concentration on charge density consumption using  $CuCl_2$  as metal precursor.

23

24

25

26

27

28

29

30

31

32

33

34

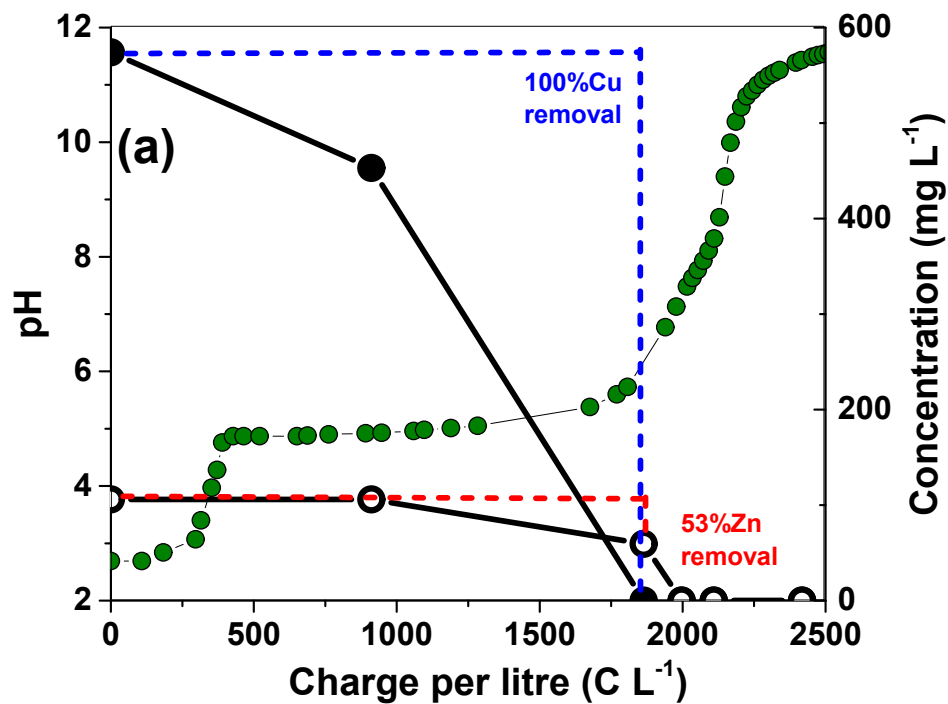

35

36

37

38

39

40

41

42

43

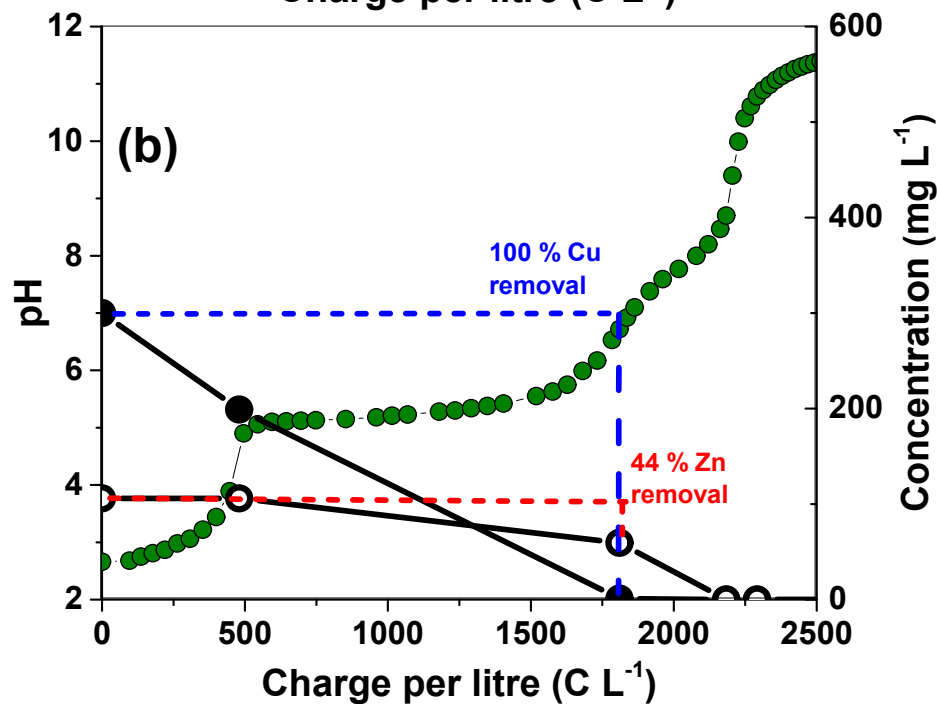

44

45

46 **Figure ESI2.** Effect of mixed Cu<sup>2+</sup> and Zn<sup>2+</sup> concentration on charge consumption during the

47 synthesis of herberthsmithite. (a) High initial Cu<sup>2+</sup> concentration ; (b) Low initial Cu<sup>2+</sup>

48 concentration.

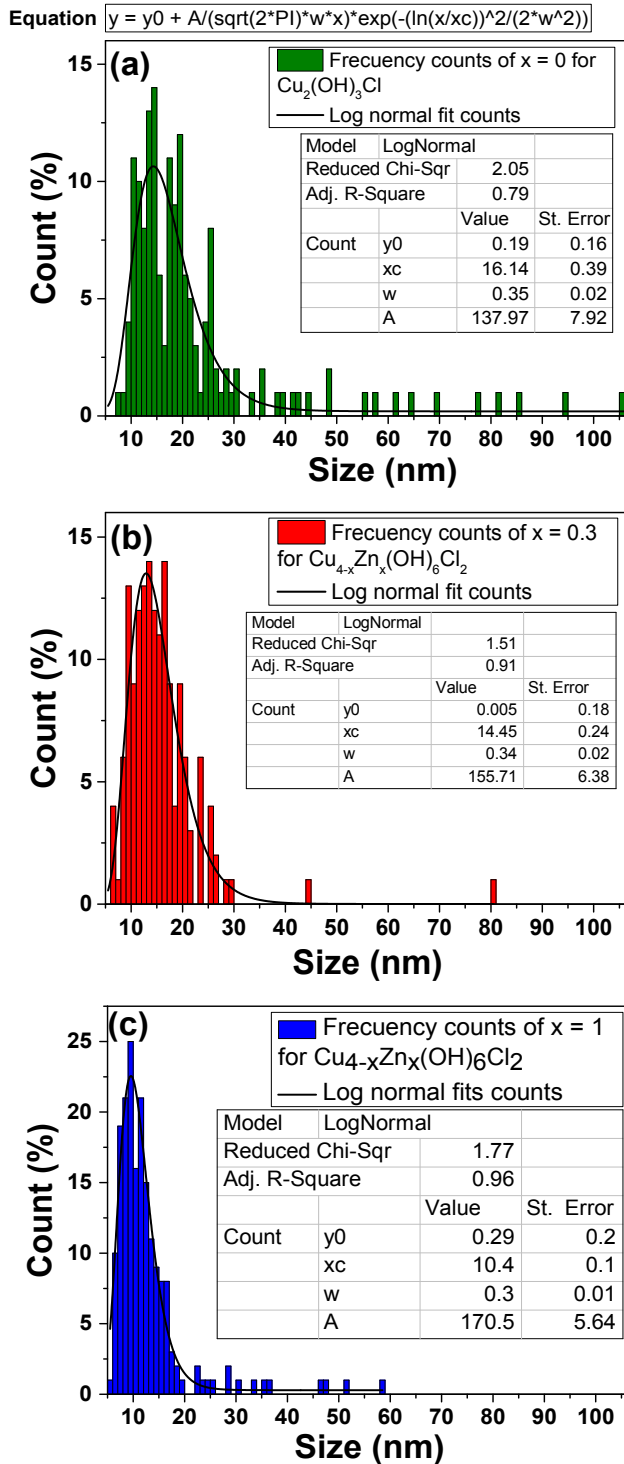

69 **Figure ESI3.** Mean particle size and distribution of  $\text{Zn}_x\text{Cu}_{4-x}(\text{OH})_6\text{Cl}_2$  products with a desired  
 70 value for  $x$ , a)  $x = 0$  for clinoatacamite ; b)  $x = 0.3$  for paratacamite and c)  $x = 1$  for  
 71 herbertsmithite.

72

73

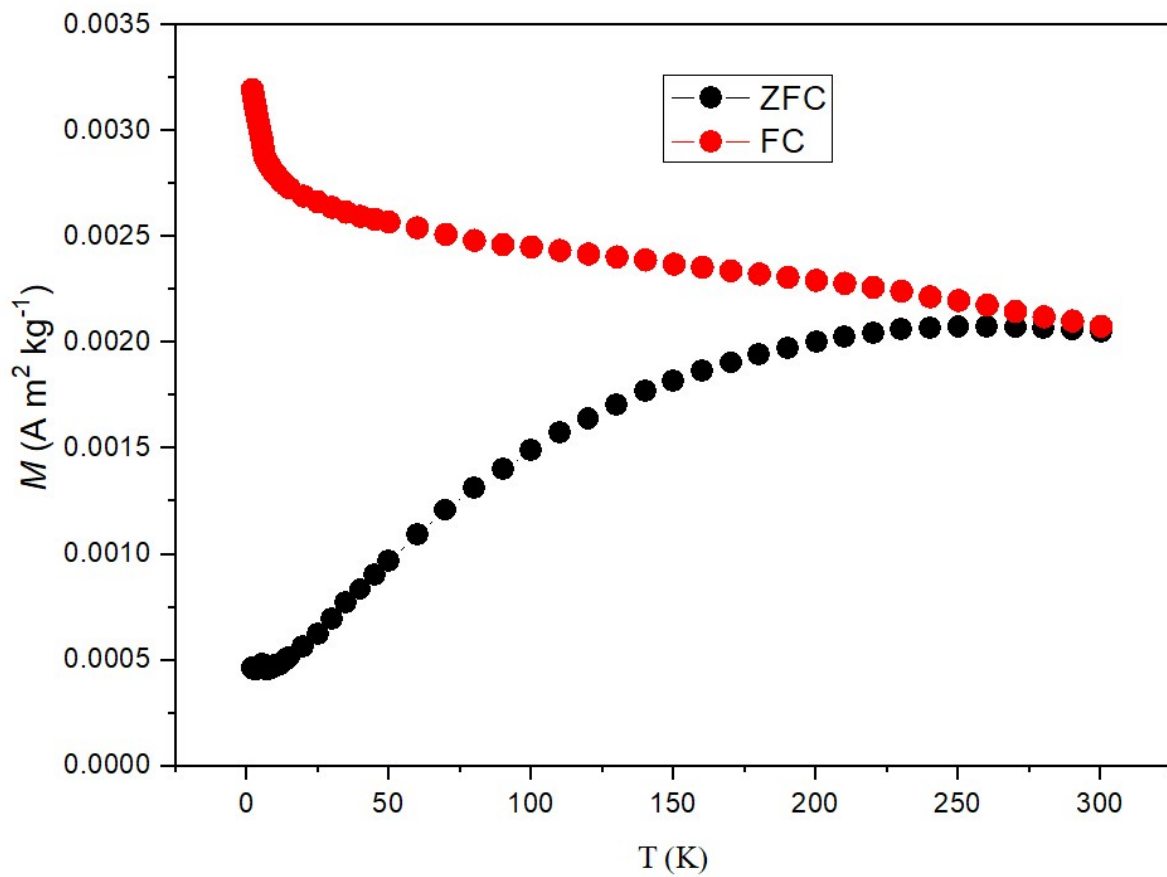

74

75 **Figure ESI4.** Temperature dependence of mass magnetization ( $M$ ) at 8 kA/m (100 Oe) for CuO  
76 as measured under ZFC-FC conditions.

77

78

79

80

81

82

83

84 **Table S1.** Quantitative phase analysis (QPA) by Rietveld method and ICP-OES of powder samples.

| Sample code | Charge consumed<br>(C L <sup>-1</sup> ) | ICP powder<br>mg g <sup>-1</sup> solid |     | (mmol) |     | Cu/Zn<br>ratio | Phase percentage (%)                                                |     |                     |     | Cu and Zn in<br>Cu <sub>4-x</sub> Zn <sub>x</sub> (OH) <sub>6</sub> Cl <sub>2</sub> |            | Stoichiometric<br>coefficient<br>(x) |
|-------------|-----------------------------------------|----------------------------------------|-----|--------|-----|----------------|---------------------------------------------------------------------|-----|---------------------|-----|-------------------------------------------------------------------------------------|------------|--------------------------------------|
|             |                                         | Cu                                     | Zn  | Cu     | Zn  |                | Cu <sub>4-x</sub> Zn <sub>x</sub> (OH) <sub>6</sub> Cl <sub>2</sub> | ZnO | Cu(OH) <sub>2</sub> | CuO | Cu<br>(mM)                                                                          | Zn<br>(mM) |                                      |
| Sample (a)  | 987                                     | 546                                    |     | 8.6    |     |                | 100                                                                 | 0   | 0                   | 0   | 8.6                                                                                 |            | 0                                    |
| Sample (b)  | 1876                                    | 783                                    |     | 12.3   |     |                |                                                                     |     |                     | 100 | 12.3                                                                                |            | 0                                    |
| Sample (c1) | 778                                     | 469                                    | 64  | 7.4    | 1.0 | 7.3            | 82                                                                  | 3.2 | 15                  | 0   | 7.1                                                                                 | 0.8        | 0.3                                  |
| Sample (c2) | 850                                     | 524                                    | 72  | 8.3    | 1.1 | 7.3            | 98                                                                  | 1.6 | 1.8                 | 0   | 8.2                                                                                 | 1.1        | 0.4                                  |
| Sample (d1) | 2000                                    | 462                                    | 150 | 7.3    | 2.3 | 3.1            | 77                                                                  | 15  | 8                   | 0   | 6.2                                                                                 | 2.1        | 1.0                                  |
| Sample (d2) | 2018                                    | 467                                    | 144 | 7.4    | 2.2 | 3.2            | 80                                                                  | 16  | 4                   | 0   | 6.2                                                                                 | 2.1        | 1.0                                  |

85

86

87

88

89

90

91

92

93

94

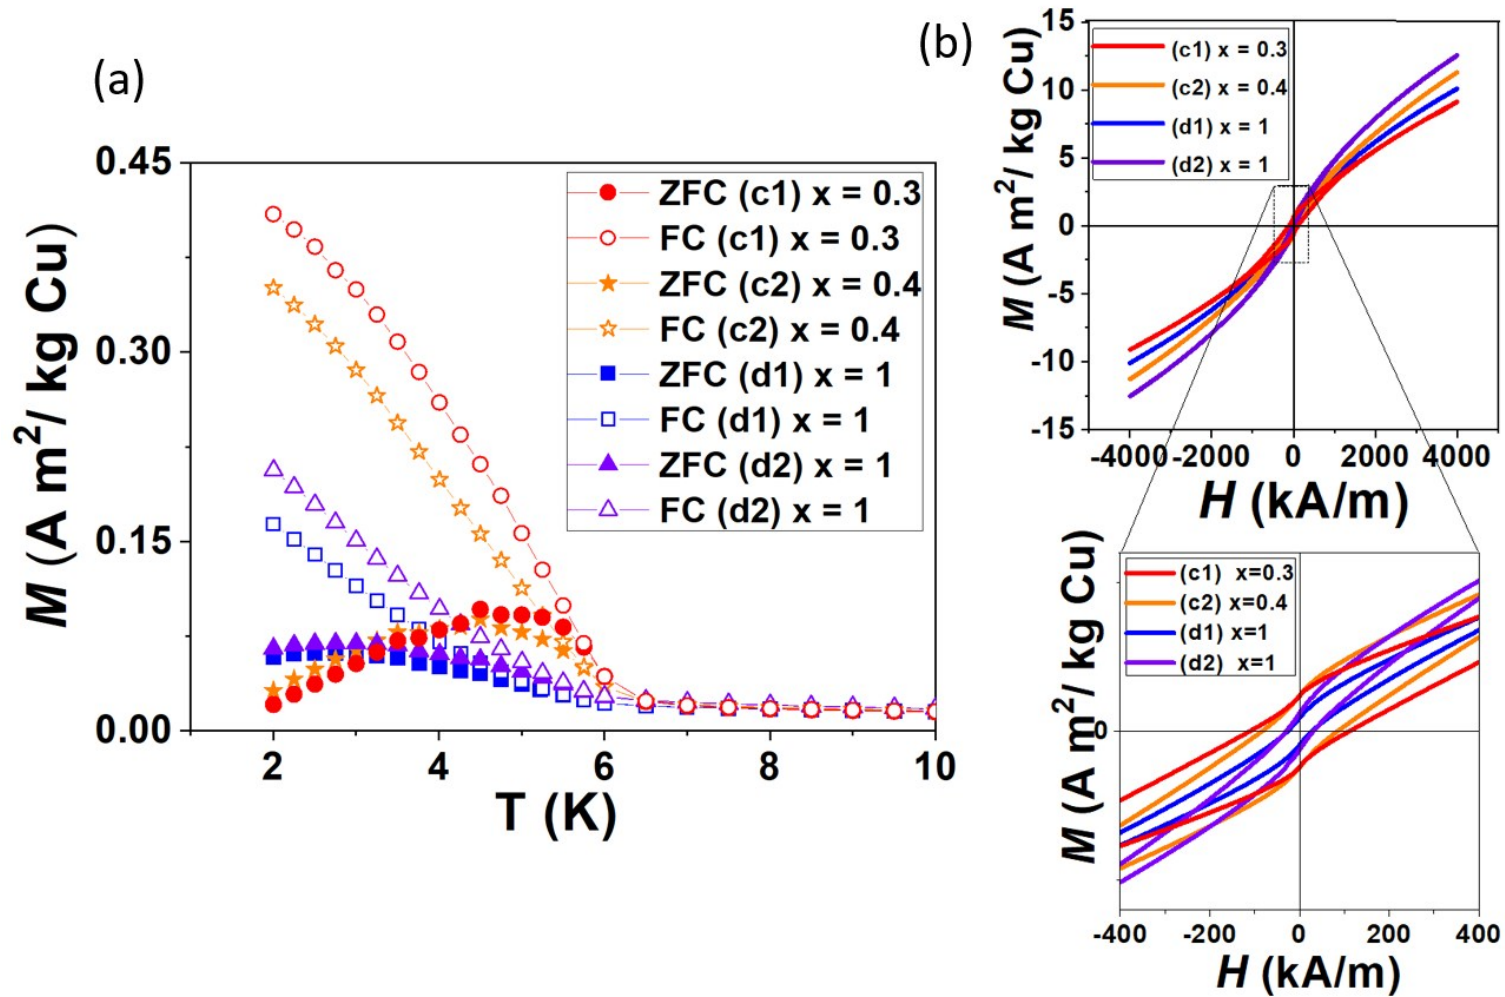

95

96 **Figure EIS5.** (a) ZFC-FC thermal magnetization of a duplicates sample with stoichiometric coefficient ( $x = 1$  and  $x = 0.3$ ). (b)

97 Magnetization against field over temperature sweep at 2.0 K in duplicate samples.
